# Supplementary material
Source: Springer Nature journal article supplement (https://www.springermedizin.de/resource/supplementary/13054_2014_2564_MOESM1_ESM.pdf/9714266)
Supplement: MOESM1 [file 9714266]

923 studies identified  
Medline: 585  
Google Scholar: 298  
Lilacs: 19  
SciELO: 21

833 studies after  
duplicates removed

31 of full-text articles  
assessed for  
eligibility

28 studies included

802 excluded

Report of prognostic models  
other than SAPS 3 (n=712)  
Reviews/Editorials (n=64)  
Language restriction (n=26)

3 of full-text articles excluded  
- Data before 2002 (n=1)  
- Calibration not evaluated  
(n=2)
